# Supplementary material
Source: publisher figshare collection journal article supplement (https://karger.figshare.com/ndownloader/files/38921669)
Supplement: Supplementary file 1 [file 38921669]

**Table** **S1**: Parameters estimates when type used as moderator.

|  | n | Estimate | S.E | t value | p value | C.I | |
| --- | --- | --- | --- | --- | --- | --- | --- |
| low | upper |
| Abdominal | 2 | -1.0445 | 0.2515 | -4.1528 | **0.003** | -1.6244 | -0.4645 |
| Cardiovascular | 1 | -0.2913 | 0.4459 | -0.6534 | 0.532 | -1.3196 | 0.7369 |
| Medical | 4 | -0.3867 | 0.1767 | -2.1883 | 0.06 | -0.7942 | 0.0208 |
| Noncardiac | 1 | -0.0145 | 0.3829 | -0.038 | 0.971 | -0.8974 | 0.8683 |
| Orthopaedic | 5 | -0.0364 | 0.1744 | -0.2085 | 0.84 | -0.4386 | 0.3658 |

n=number of studies, S.E= standard Error, C.I=confidence intervals, **in bold**= significant
